# Supplementary material for: A novel core–shell molecularly imprinted polymer based on metal–organic frameworks as a matrix
Source: Royal Society of Chemistry journal article supplement (doi:10.1039/c1cc12935j), 2011-01-01
Supplement: c1cc12935j.pdf [file c1cc12935j.pdf]

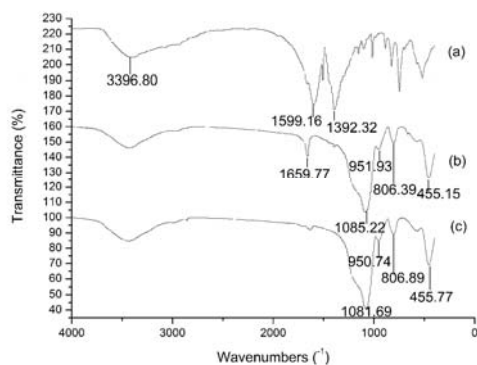

Fig. S1 FTIR spectrum of (a) MOF-5, (b) MOF@MIP and (c) MIP.

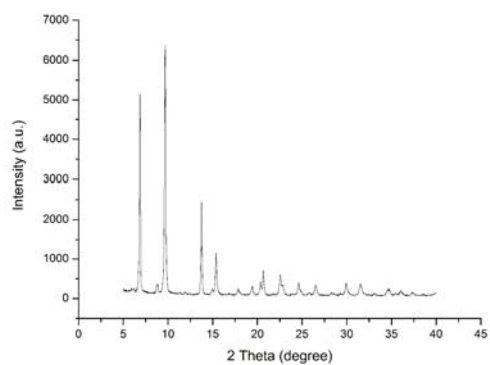

(a)

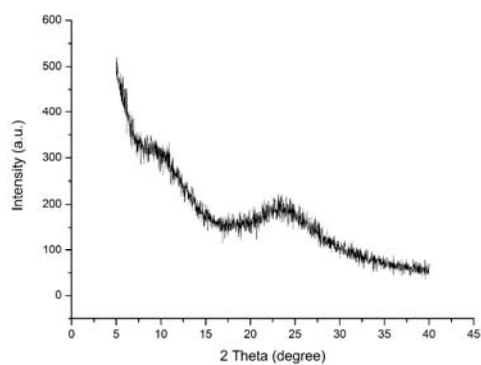

(b)

Fig. S2 Powder X-ray diffraction patterns for (a) MOF-5 and (b) MOF@MIP.

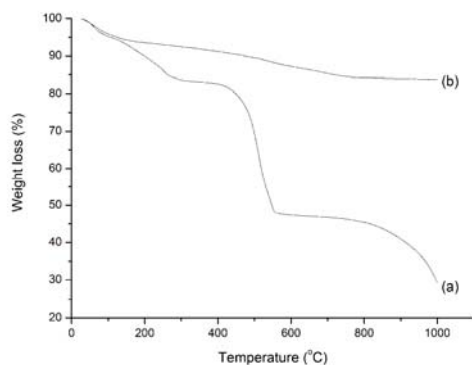

Fig. S3 Thermogravimetric analysis for (a) MOF-5 and (b) MOF@MIP.

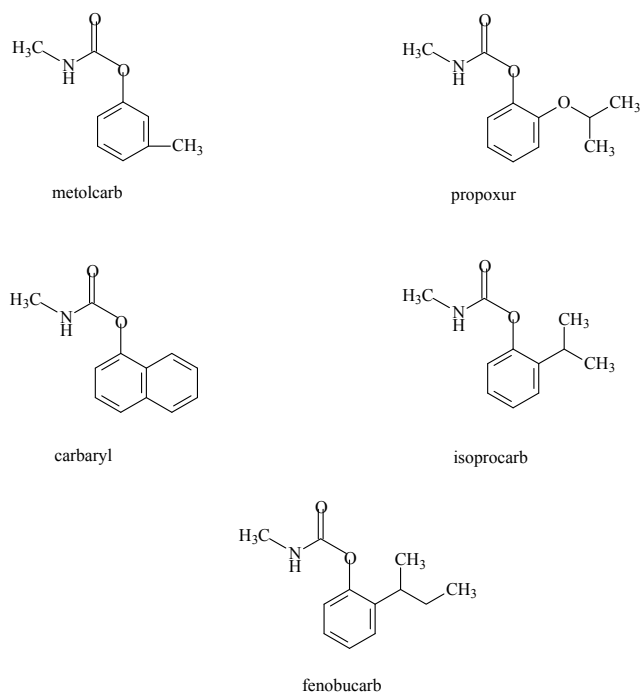

Fig. S4 The structures of metolcarb, propoxur, carbaryl, isoprocarb and fenobucarb.

**Table S1** Comparison of kinetic parameters for the adsorption of metolcarb

| Adsorbent | $q_e$ (exp) | Pseudo-first-order kinetics |             |        | Pseudo-second-order kinetics |             |        |
|-----------|-------------|-----------------------------|-------------|--------|------------------------------|-------------|--------|
|           |             | $K_1$                       | $q_e$ (cal) | $R^2$  | $K_2$                        | $q_e$ (cal) | $R^2$  |
|           | 1.26        | 0.061                       | 0.223       | 0.6679 | 0.358                        | 1.30        | 0.9987 |
| MOF@MIP   |             | Elovich                     |             |        | Intra-particle diffusion     |             |        |
|           |             | $\alpha$                    | $\beta$     | $R^2$  | $k_{\text{int}}$             | C           | $R^2$  |
|           |             | 6.23                        | 5.83        | 0.8165 | 0.070                        | 0.79        | 0.6758 |

$K_1$ , the rate constant of pseudo-first-order adsorption process ( $\text{min}^{-1}$ ),  $\ln(q_e - q_t) = \ln q_e - K_1 t$ . Where  $q_t$  and  $q_e$  are the amounts of analyte adsorbed at time  $t$  and at equilibrium ( $\mu\text{mol g}^{-1}$ ), respectively.

$K_2$ , the rate constant of pseudo-second-order sorption ( $\text{g } \mu\text{mol}^{-1} \text{ min}^{-1}$ ),  $\frac{t}{q_t} = \frac{1}{K_2 q_e^2} + \frac{t}{q_e}$ .

$q_t = \frac{1}{\beta} \ln(\alpha\beta) + \frac{1}{\beta} \ln t$ . Where  $\alpha$  is the initial sorption rate constant ( $\mu\text{mol g}^{-1} \text{ min}^{-1}$ ), and the parameter  $\beta$  is related to the extent of surface coverage and activation energy for chemisorption ( $\text{g } \mu\text{mol}^{-1}$ ).

$q_t = k_{\text{int}} t^{1/2} + C$ . Where  $k_{\text{int}}$  is the intra-particle diffusion rate constant ( $\mu\text{mol g}^{-1} \text{ min}^{-1/2}$ ), and  $C$  is the intercept.

**Table S2** Competitive loading of metolcarb, propoxur, carbaryl, isoprocarb and fenobucarb by MOF@MIP and MOF@NIP

|                                                |            | MOF@MIP | MOF@NIP |
|------------------------------------------------|------------|---------|---------|
| Loading Capacity<br>( $\mu\text{mol g}^{-1}$ ) | metolcarb  | 1.1848  | 0.5218  |
|                                                | propoxur   | 0.2027  | 0.3457  |
|                                                | carbaryl   | 0.2445  | 0.4030  |
|                                                | isoprocarb | 0.4725  | 0.4031  |
|                                                | fenobucarb | 0.3783  | 0.4357  |
| $K_d$                                          | metolcarb  | 19.94   | 8.68    |
|                                                | propoxur   | 4.26    | 7.28    |
|                                                | carbaryl   | 4.91    | 8.13    |
|                                                | isoprocarb | 9.26    | 7.85    |
|                                                | fenobucarb | 7.90    | 9.11    |
| $K$                                            | propoxur   | 4.68    | 1.19    |
|                                                | carbaryl   | 4.06    | 1.07    |
|                                                | isoprocarb | 2.16    | 1.11    |
|                                                | fenobucarb | 2.52    | 0.95    |
| $K'$                                           | propoxur   |         | 3.93    |
|                                                | carbaryl   |         | 3.80    |
|                                                | isoprocarb |         | 1.96    |
|                                                | fenobucarb |         | 2.65    |

$K_d$ , distribution coefficient,  $K_d = \{(C_i - C_f) / C_f\} \times \{\text{volume of solution (mL)}\} / \{\text{mass of gel (g)}\}$ .

Where  $C_i$  and  $C_f$  represent the initial and final concentrations, respectively.

$K$ , selectivity coefficient,  $K = K_d(\text{metolcarb}) / K_d(\text{competitors})$ .

$K'$ , relative selectivity coefficient,  $K' = K_{\text{MIP}} / K_{\text{NIP}}$ .
